# Supplementary material for: Ti(iv) oxalate complex-derived hierarchical hollow TiO2materials with dye degradation properties in water
Source: Royal Society of Chemistry journal article supplement (doi:10.1039/c5dt03291a), 2015-11-11
Supplement: c5dt03291a1.pdf [file c5dt03291a1.pdf]

## Supporting Information

### **Ti(IV) oxalate complex-derived hierarchical hollow TiO<sub>2</sub> materials with degradation properties of dye in water**

**Ye Zhang, Zhen-An Qiao, Junmin Liu, Xue Wang, Shuo Yao, Tao Wang, Bing Liu, Yali Ma, Yunling Liu, Qisheng Huo\***

State Key Laboratory of Inorganic Synthesis and Preparative Chemistry, College of Chemistry, Jilin University, Changchun 130012; P. R. China.

\*E-mail: [huoqisheng@jlu.edu.cn](mailto:huoqisheng@jlu.edu.cn)

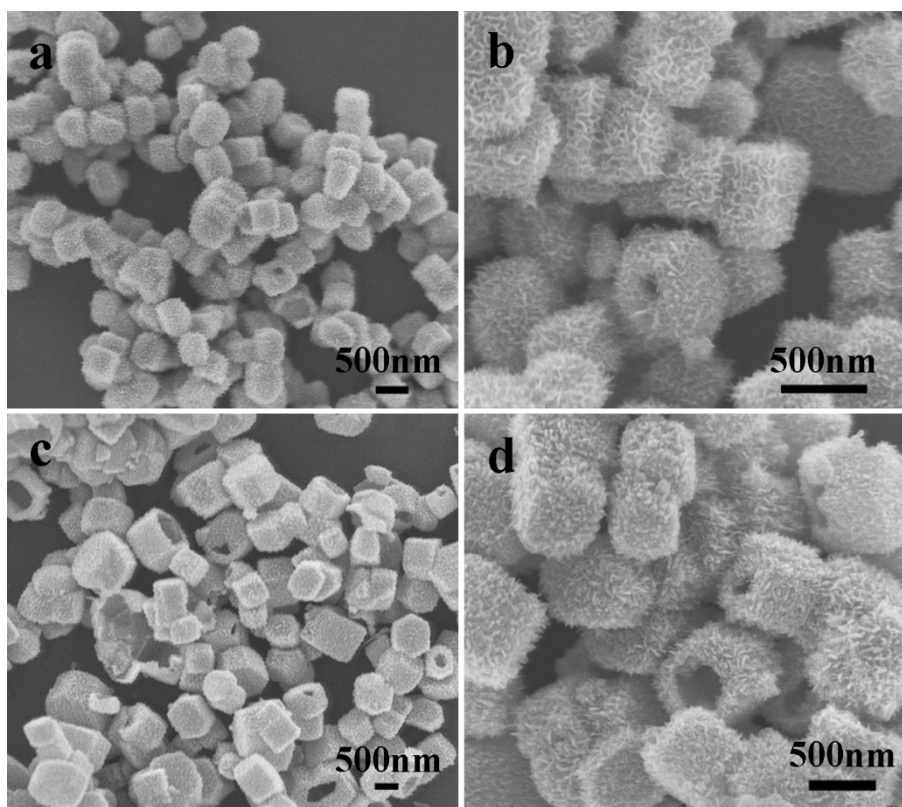

**Fig. S1** SEM images of HHTM-1 (cal, a and b), HHTM-2 (cal, c and d).

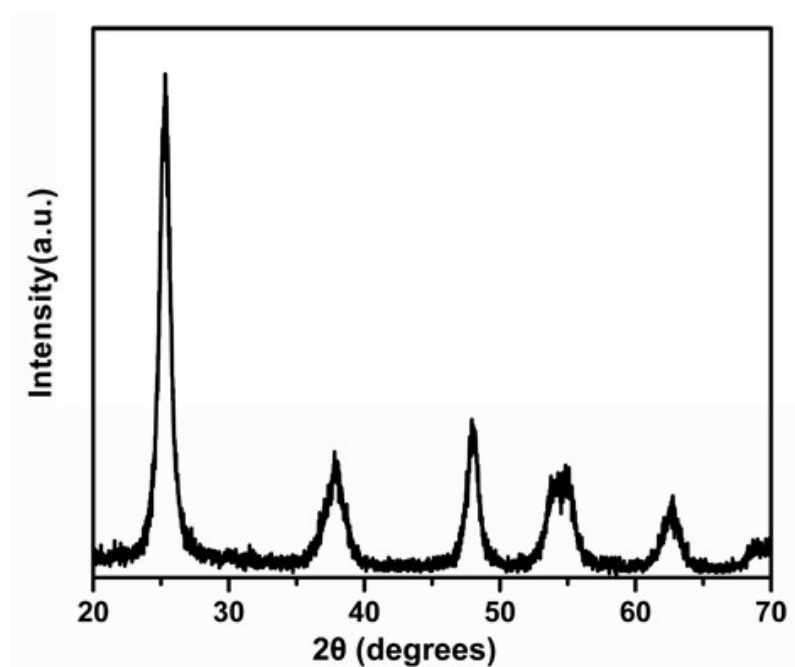

**Fig. S2** XRD pattern of HHTM-1 (cal).

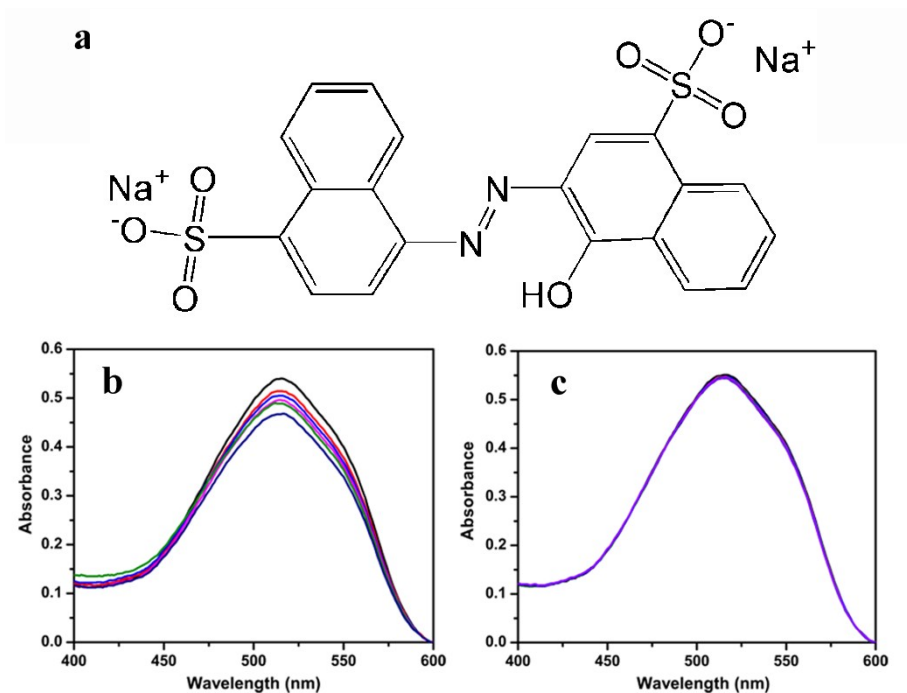

**Fig. S3** Structure of chromotrope FB (a) Time profiles of chromotrope FB absorbance spectrum during degradation process by using different catalysts: Degussa P25 (b), blank experiment (c).

**Table S1.** Main compounds in the final colorless solution identified by LC-MS.

| Compound               | Molecular formula                                                                   | <i>m/z</i> |
|------------------------|-------------------------------------------------------------------------------------|------------|
| phthalic acid          | 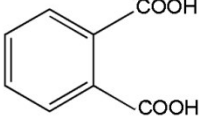 | 166        |
| 3-Hydroxyphthalic acid |  | 182        |
| 3-Sulfophthalic Acid   |  | 245        |
